# Supplementary material for: Efficacy and safety of durable versus biodegradable polymer drug-eluting stents in patients with acute myocardial infarction complicated by cardiogenic shock
Source: PubMed Central journal article supplement (PMC10943207; doi:10.1038/s41598-024-56925-2), 2024-03-15
Supplement: 41598_2024_56925_MOESM2_ESM.pdf [file 41598_2024_56925_MOESM2_ESM.pdf]

## Supplementary Information

### **Efficacy and Safety of Durable Versus Biodegradable Polymer Drug-Eluting Stents in Patients with Acute Myocardial Infarction Complicated by Cardiogenic Shock**

#### **Running title: Durable- vs. biodegradable polymer DES in CS**

Woo Jin Jang, MD<sup>1</sup>; Ik Hyun Park, MD<sup>2</sup>; Ju Hyeon Oh, MD<sup>2</sup>; Ki Hong Choi, MD<sup>3</sup>; Young Bin Song, MD<sup>3</sup>; Joo-Yong Hahn, MD<sup>3</sup>; Seung-Hyuk Choi, MD<sup>3</sup>; Hyeon-Cheol Gwon, MD<sup>3</sup>; Chul-Min Ahn, MD<sup>4</sup>; Cheol Woong Yu, MD<sup>5</sup>; Hyun-Joong Kim, MD<sup>6</sup>; Jang-Whan Bae, MD<sup>7</sup>; Sung Uk Kwon, MD<sup>8</sup>; Hyun Jong Lee, MD<sup>9</sup>; Wang Soo Lee, MD<sup>1</sup>; Jin-Ok Jeong, MD<sup>10</sup>; Sang-Don Park, MD<sup>11</sup>; Jeong Hoon Yang, MD<sup>3\*</sup>

<sup>1</sup>Division of Cardiology, Chung-Ang University Hospital, Seoul, Republic of Korea

<sup>2</sup>Department of Cardiology, Samsung Changwon Hospital, Sungkyunkwan University School of Medicine, Changwon, Republic of Korea

<sup>3</sup>Division of Cardiology, Heart Vascular Stroke Institute, Samsung Medical Center, Sungkyunkwan University School of Medicine, Seoul, Republic of Korea

<sup>4</sup>Division of Cardiology, Severance Cardiovascular Hospital, Yonsei University College of Medicine, Seoul, Republic of Korea

<sup>5</sup>Division of Cardiology, Department of Internal Medicine, Korea University Anam Hospital, Seoul, Republic of Korea.

<sup>6</sup>Division of Cardiology, Konkuk University Medical Center, Seoul, Republic of Korea

<sup>7</sup>Division of Cardiology, Chungbuk National University College of Medicine, Cheongju, Republic of Korea

<sup>8</sup>Division of Cardiology, Ilsan Paik Hospital, University of Inje College of Medicine, Seoul, Republic of Korea

<sup>9</sup>Division of Cardiology, Sejong General Hospital, Bucheon, Republic of Korea

<sup>10</sup>Division of Cardiology, Chungnam National University Hospital, Daejeon, Republic of Korea

<sup>11</sup>Division of Cardiology, Inha University Hospital, Incheon, Republic of Korea

Dr. Jang and Dr. Park equally contributed to this work as first authors.

**Correspondence:**

\* Jeong Hoon Yang, MD, PhD

Division of Cardiology, Department of Critical Care Medicine and Medicine,  
Samsung Medical Center, Sungkyunkwan University School of Medicine,  
81 Irwon-ro, Gangnam-gu, Seoul, 135-710, Republic of Korea

Phone: +82-2-3410-1768, FAX: +82-2-2148-7088

Email: [jhysmc@gmail.com](mailto:jhysmc@gmail.com)

**(1) Supplementary Figure S1 legend**

**Supplementary Figure S1. Time-to-event Kaplan-Meier survival curves of primary outcome according to polymer after inverse probability of treatment weighting adjustment**

(a) Kaplan-Meier curves for target vessel failure. (b) Kaplan-Meier curves for cardiac death. (c) Kaplan-Meier curves for myocardial infarction. (d) Kaplan-Meier curves for target vessel revascularization.

TVF was defined as a composite of cardiac death, MI, and target vessel revascularization.

BP-DES = bioabsorbable polymer drug-eluting stent; DP-DES = durable polymer drug-eluting stent.
